# Supplementary material for: Size‐Dependent Dynamic Behavior of a Microcantilever Plate
Source: Hindawi journal article supplement (doi:10.1155/2012/891347), 2012-01-01
Supplement: f1 [file 891347.f1.doc]

**SUPPLEMENTS**

**The Governing Equation of Micro Cantilever Plates**

According to classical elasticity theory, the displacement of plate is expressed as:

(1)

then from *εij= (ui,j+uj,i)/2*, the strain tensor [represented as](http://dict.cnki.net/dict_result.aspx?searchword=表示为&tjType=sentence&style=&t=represented+as):

(2)

The curvature tensor is *χij*=*ωi,j* , and *ωi=eijkuk,j/2*, there:

(3)

Based on modified couple stress theory of Yang, the strain energy is expressed as: (4)

where, *μ* and *λ* is Lamé coefficient, *μ*=*E/2(1+υ)*, *λ*=*Eυ/(1-υ2)*, *E* is Young modulus, *υ* is Poisson ratio, *l* is material length scale parameter (Micro/nano magnitude).

The Kinetic energy of vibrating cantilever plate denoted as:

(5)

Here, *ρ* is density of plate. Consider to the kinetic energy along the x, y direction much less than along the z direction, wherefore, the kinetic energy along the x, y direction is ignored. The expression is simplified to:

(6)

The external work is expressed as:

(7)

According to Hamilton principle, there:

(8)

Here, Hamilton actuating quantity *S* is:

(9)

For static bending cantilever plate, the kinetic energy T is zero, then combining Eq. (8) and Eq. (9), the governing equation of cantilever plate under uniform load is presented:

(10)

where, *D* is Classic stiffness coefficient, *D’* is Additional stiffness coefficient. Both denoted as:

(11)

On this basis, the vibrating governing equation of plate under uniform load is expressed as:

(12)

It should be noted, the governing equation based on a modified couple stress theory contains only one material length scale parameter which can capture the size effect. When the length scale parameter *l* is zero, the equation is transformed into the classical equation of Kirchhoff plate.

**Solutions by DQM**

The differential quadrature method (DQM) is an efficient numerical technique for the solution of initial and boundary value problems. In this article, static bending and vibrating governing equation of cantilever plate is solved using DQM.

In DQ method, a derivative of a function *g(x)* is expressed as:

(13)

where

(14)

Here, *M(xi)* is defined as:

(15)

and when *i=j,*

(16)

The weighting coefficients for the second, third, and fourth derivatives are determined are expressed as:

(17)

For static bending governing equation, order to *ξ*=*x/L*，*η*=*y/b*(0<*ξ*<1,0<*η*<1), *L* and *b* is length and width of cantilever plate, respectively. The equation of coordinate dimensionless form:

(18)

Using Eq. (13), the Eq. (18) is transformed into a DQ form:

(19)

Here, *i=1, 2…Nx*，*j=1, 2…Ny*, and *Nx*, *Ny* are the numbers of grid points along the length and breadth of micro-plate, respectively. The above DQ equation can be easily transformed into matrix form:

(20)

where, *C* is weight coefficient matrix, *w* is nodal displacement array, *q* is load array. When weight coefficient matrix *C* is determined, the displacement fields of cantilever plate are presented using Lagrange interpolation.

For vibrating governing equation, assume a harmonic solution as:

(21)

where *W* is the nondimensional amplitude, *ω* is the circular frequency, substituting Eq. (21) and Eq. (12), there:

(22)

Similarly, the vibrating equation of nondimensional form is transformed into a DQ form using Eq. (13):

(23)

The matrix form is expressed as:

(24)

When weight coefficient matrix *C* is determined, the natural frequency, which corresponds to maximum displacement, is presented. It should be noted, the frequency value equal to the natural frequency of free vibrating plate, because the uniform load doesn’t affect the natural frequency.

The grid point distributions are taken based on well accepted Gauss–Chebyshev–Lobatto points:

(25)

The cantilever boundary conditions are mathematically represented as:

(26)

The boundary condition problem is solved based on the equation substitution method, that is, the algebraic equation, that closest to the boundary points, is replaced by an algebraic equation of boundary condition. This method is applicable to the situation of non-uniform nodes, and has high accuracy.

The DQ form of Eq. (26) is expressed as:

(27)

The above 4(*Nx*+*Ny*) positive equations of boundary condition are the DQ constraint equations. Substituting Eq. (27) into Eq. (19) and Eq. (23), and the node equations are replaced. Then the solvable linear equations including boundary condition are presented.

On this basis, the static deflection and natural frequency of cantilever plate are obtained using Eq. (20) and Eq. (24).
